# Supplementary material for: Transcriptomic analyses reveal biosynthetic genes related to rosmarinic acid in Dracocephalum tanguticum
Source: PubMed Central journal article supplement (PMC5428373; doi:10.1038/s41598-017-00078-y), 2017-03-06
Supplement: 41598_2017_78_MOESM1_ESM.pdf [file 41598_2017_78_MOESM1_ESM.pdf]

**Transcriptomic analyses reveal biosynthetic genes related to rosmarinic acid in  
*Dracocephalum tanguticum***

Huie Li<sup>1,3</sup>, Yaru Fu<sup>1</sup>, Hao Sun<sup>4</sup>, Yanfu Zhang<sup>1</sup>, Xiaozhong Lan<sup>1,2\*</sup>

<sup>1</sup>Medicinal Plants Research Centre, Tibet Agricultural and Animal Husbandry College, Nyingchi 860000, China. <sup>2</sup>TAAHC-SWU Medicinal Plants Joint Research and Development Centre, Tibet Agricultural and Animal Husbandry College, Nyingchi 860000, China. <sup>3</sup>College of Agriculture, Guizhou University, Guiyang 550025, China. <sup>4</sup>Institute of Applied Ecology, Chinese Academy of Sciences, Shenyang 110016, China. Correspondence and requests for materials should be addressed to X. L. (email: lanxiaozhong@163.com)

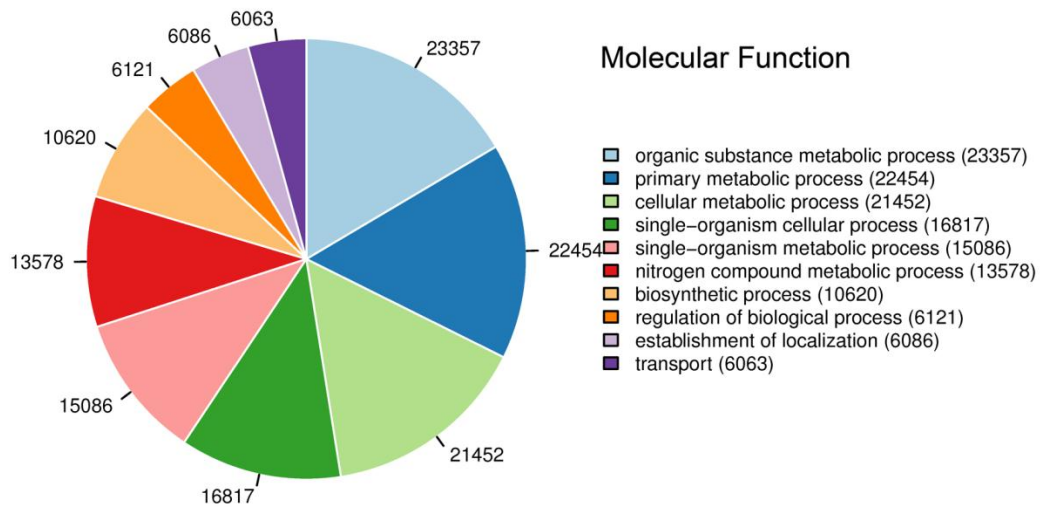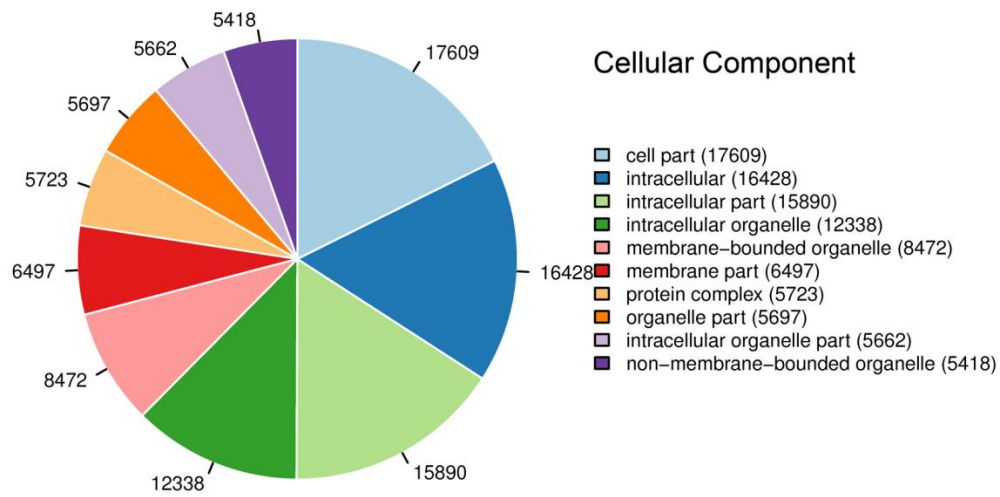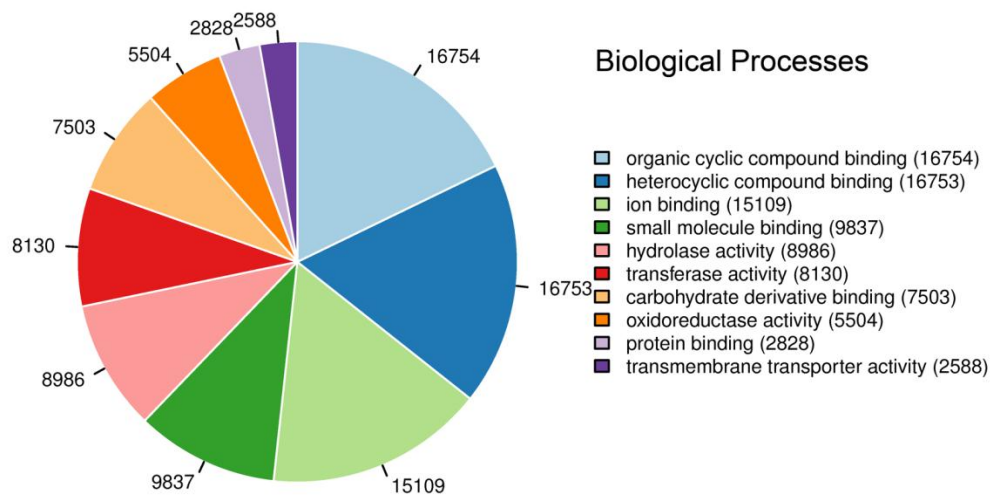

Fig. S1 Gene ontology classification of unigenes.

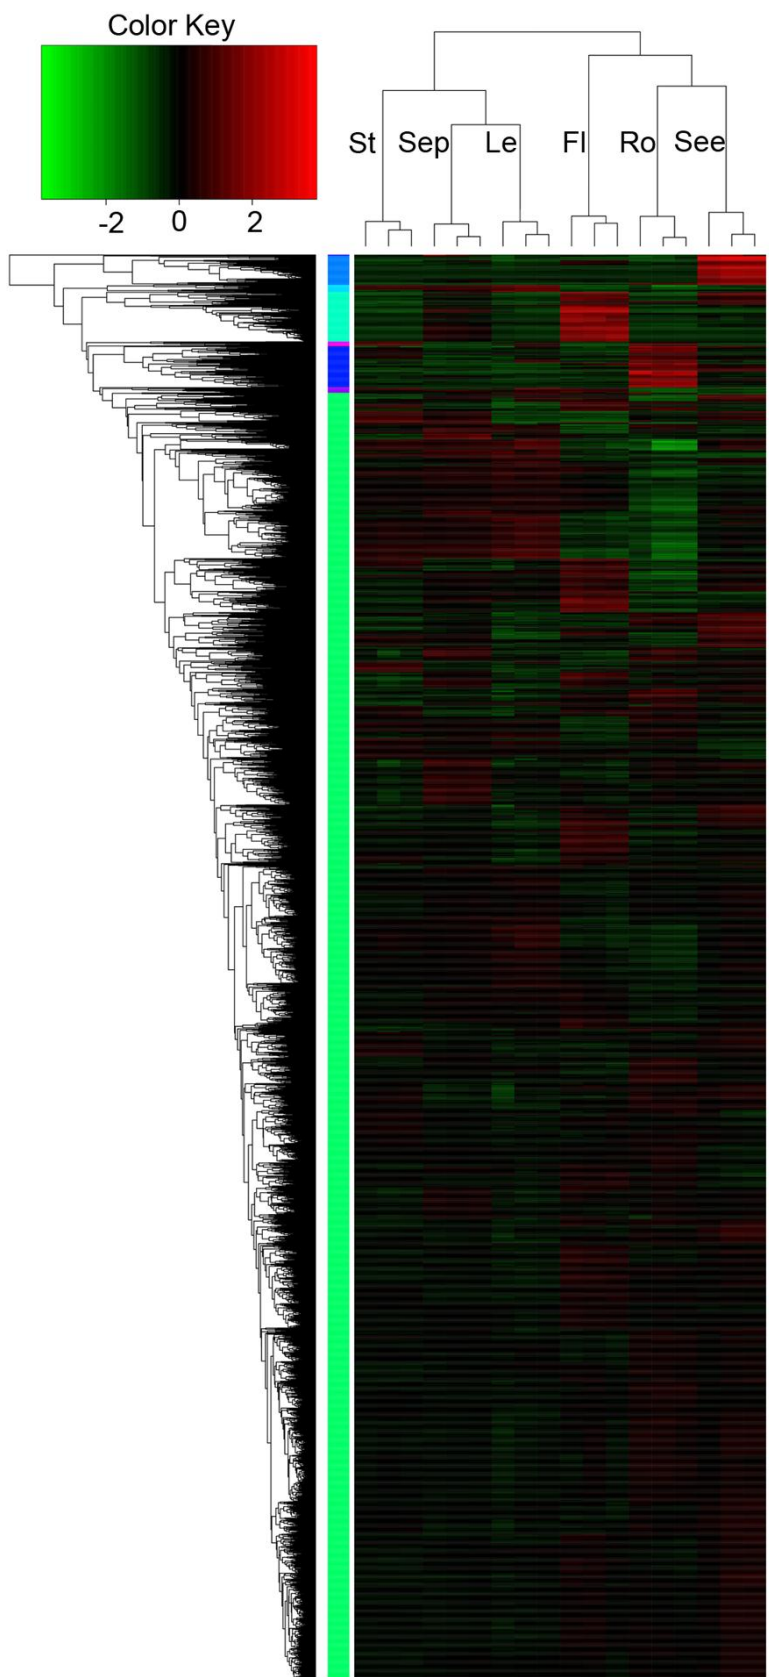

Fig. S2 Clustered the differentially expressed unigenes in the six organs

Table S1 Correlation coefficient of RNA-Seq data among three triplicates of each organ.

| Samples | Flower1 | Flower2 | Leaf1  | Leaf2  | Root1  | Root2  | Seed1  | Seed2  | Sepal1 | Sepal2 | Stem1  | Stem2  |
|---------|---------|---------|--------|--------|--------|--------|--------|--------|--------|--------|--------|--------|
| Flower2 | 0.9372  |         |        |        |        |        |        |        |        |        |        |        |
| Flower3 | 0.9376  | 0.8956  |        |        |        |        |        |        |        |        |        |        |
| Leaf2   |         |         | 0.8823 |        |        |        |        |        |        |        |        |        |
| Leaf3   |         |         | 0.9367 | 0.9842 |        |        |        |        |        |        |        |        |
| Root2   |         |         |        |        | 0.8589 |        |        |        |        |        |        |        |
| Root3   |         |         |        |        | 0.8836 | 0.9128 |        |        |        |        |        |        |
| Seed2   |         |         |        |        |        |        | 0.9886 |        |        |        |        |        |
| Seed3   |         |         |        |        |        |        | 0.9455 | 0.9355 |        |        |        |        |
| Sepal2  |         |         |        |        |        |        |        |        | 0.8672 |        |        |        |
| Sepal3  |         |         |        |        |        |        |        |        | 0.9847 | 0.8806 |        |        |
| Stem2   |         |         |        |        |        |        |        |        |        |        | 0.9397 |        |
| Stem3   |         |         |        |        |        |        |        |        |        |        | 0.9821 | 0.9599 |

Table S2 Total raw reads yielded from all 18 libraries.

| Sample ID | Total Reads | Total Bases | Total Reads with_Ns | NReads% | A%    | T%    | C%    | G%    | N%   | Error% | Q20%  | Q30%  | GC%   | Adapter % | Read1 Dup (%) | Read2 Dup (%) | Paired Dup (%) |
|-----------|-------------|-------------|---------------------|---------|-------|-------|-------|-------|------|--------|-------|-------|-------|-----------|---------------|---------------|----------------|
| F_1       | 38445900    | 5.81E+09    | 190607              | 0.5     | 26.55 | 25.32 | 23.59 | 24.52 | 0.02 | 0.0163 | 95.46 | 89.42 | 48.1  | 41.76     | 21.54         | 14.32         | 4.47           |
| F_2       | 45308450    | 6.84E+09    | 225848              | 0.5     | 26.21 | 25.25 | 23.85 | 24.67 | 0.02 | 0.0177 | 94.78 | 88.15 | 48.52 | 38.8      | 22.54         | 13.17         | 3.72           |
| F_3       | 35235570    | 5.32E+09    | 175033              | 0.5     | 26.77 | 25.37 | 23.4  | 24.44 | 0.02 | 0.0177 | 94.66 | 88.18 | 47.84 | 42.76     | 21.51         | 13.51         | 4.16           |
| L_1       | 41033628    | 6.2E+09     | 204363              | 0.5     | 26.56 | 25.25 | 23.64 | 24.53 | 0.02 | 0.0171 | 95.01 | 88.67 | 48.17 | 41.45     | 20.8          | 13.58         | 4.35           |
| L_2       | 37761670    | 5.7E+09     | 358412              | 0.95    | 26.01 | 24.93 | 24.12 | 24.92 | 0.02 | 0.0176 | 94.9  | 88.23 | 49.04 | 39.74     | 24.95         | 16.68         | 5.37           |
| L_3       | 43359034    | 6.55E+09    | 412417              | 0.95    | 26.22 | 25.09 | 23.86 | 24.81 | 0.02 | 0.0161 | 95.57 | 89.51 | 48.67 | 40.87     | 23.19         | 16.88         | 5.41           |
| R_1       | 46047834    | 6.95E+09    | 229608              | 0.5     | 26.04 | 24.82 | 24.08 | 25.04 | 0.02 | 0.0161 | 95.45 | 89.46 | 49.12 | 43.44     | 32.72         | 23.3          | 11.46          |
| R_2       | 37916320    | 5.73E+09    | 188085              | 0.5     | 26.7  | 25.23 | 23.5  | 24.56 | 0.02 | 0.0182 | 94.46 | 87.78 | 48.06 | 44.73     | 20.91         | 12.54         | 4.15           |
| R_3       | 40672476    | 6.14E+09    | 384963              | 0.95    | 26.31 | 25.27 | 23.77 | 24.63 | 0.02 | 0.0167 | 95.25 | 88.96 | 48.4  | 38.97     | 22.56         | 15.86         | 4.51           |
| Se_1      | 32900568    | 4.97E+09    | 312878              | 0.95    | 25.55 | 24.17 | 24.67 | 25.59 | 0.02 | 0.0179 | 94.7  | 88.04 | 50.27 | 41.77     | 27.03         | 19.17         | 6.76           |
| Se_2      | 35599046    | 5.38E+09    | 337956              | 0.95    | 25.73 | 24.22 | 24.5  | 25.53 | 0.02 | 0.0173 | 94.89 | 88.45 | 50.03 | 45.39     | 26.85         | 19.00         | 7.5            |
| Se_3      | 38669318    | 5.84E+09    | 366524              | 0.95    | 25.7  | 24.67 | 24.36 | 25.25 | 0.02 | 0.0178 | 94.83 | 88.12 | 49.61 | 40.72     | 22.05         | 14.5          | 4.2            |
| Sep_1     | 45497520    | 6.87E+09    | 431392              | 0.95    | 26.59 | 25.3  | 23.56 | 24.53 | 0.02 | 0.0162 | 95.38 | 89.32 | 48.09 | 43.24     | 20.25         | 14.56         | 5.05           |
| Sep_2     | 40124352    | 6.06E+09    | 381825              | 0.95    | 26.58 | 25.42 | 23.56 | 24.42 | 0.02 | 0.0159 | 95.57 | 89.6  | 47.98 | 41.02     | 20.98         | 15.65         | 5.19           |
| Sep_3     | 52795950    | 7.97E+09    | 288854              | 0.55    | 26.44 | 25.09 | 23.74 | 24.69 | 0.03 | 0.0177 | 95.05 | 88.28 | 48.43 | 41.55     | 22.88         | 18.53         | 6.93           |
| St_1      | 43063922    | 6.5E+09     | 408485              | 0.95    | 26.24 | 25.4  | 23.84 | 24.5  | 0.02 | 0.0169 | 95.29 | 88.85 | 48.34 | 34.75     | 23.41         | 15.73         | 3.97           |
| St_2      | 34987930    | 5.28E+09    | 332643              | 0.95    | 26.42 | 25.42 | 23.64 | 24.51 | 0.02 | 0.0172 | 95.18 | 88.64 | 48.14 | 39.99     | 17.59         | 11.66         | 2.76           |
| St_3      | 41809924    | 6.31E+09    | 395541              | 0.95    | 26.24 | 25.2  | 23.86 | 24.68 | 0.02 | 0.0168 | 95.32 | 88.93 | 48.54 | 40.23     | 19.77         | 13.55         | 3.51           |

Table S5 Specific primers of genes detected by qRT-PCR.

| Gene Family name | Unigene               | Primers                  | Length of PCR products (bp) |
|------------------|-----------------------|--------------------------|-----------------------------|
| RAS              | c89832_g7F            | ATGCTCTGTGTCAGTCACTAGGA  | 143                         |
|                  | c89832_g7R            | CATTCGTCTGAAAAGGGTTTCG   |                             |
|                  | c48058_g1F            | GTGTGTGTGTGGAGTTCGAAC    | 136                         |
|                  | c48058_g1R            | GTGGGTACATCCACATCAACT    |                             |
|                  | c76931_g1F            | CTTCGCTGAGCATCACACATC    | 164                         |
|                  | c76931_g1R            | GTGTTGATGTGGGGGAACT      |                             |
|                  | c89083_g1F            | GTATGCTACTATTTGACAAGTTGC | 158                         |
|                  | c89083_g1R            | TGTCATCCCTACTTATATGGAAC  |                             |
|                  | c89083_g2F            | ATGAGCTTTTCACCGACTTCGT   | 145                         |
|                  | c89083_g2R            | CATCAAACCACGAACAGACAACA  |                             |
| PAL              | c56551_G1F            | GGCGGTGGAGCTGGCGGA       | 192                         |
|                  | c56551_G1R            | CCGAATATTCCGGCGTTCAAG    |                             |
|                  | c89407_G1F            | TCCACATCATTCCACGTGTCG    | 177                         |
|                  | c89407_G1R            | GGAAGTTTTGCAAAGCTTGTGG   |                             |
|                  | c92990_g1F            | CCCACCAACCACCACAACC      | 144                         |
|                  | c92990_g1R            | GGGGTTTGTGAGGGTGGATA     |                             |
|                  | c9678_g1F             | TGAACCTCTACCTATCTGCTAG   | 159                         |
|                  | c9678_g1R             | CAAAGTACATAGGGAGAACTCACA |                             |
| TAT              | c21214_g1F            | AGCCACAGCCAAGATGGATAGT   | 158                         |
|                  | c21214_g1R            | GGGACGGGAGAAAGTTTAGGC    |                             |
|                  | c83755_g2F            | GGCACTGCACGCCAAGAAAC     | 162                         |
|                  | c83755_g2R            | TATCACACAACCTCCCTCTGAA   |                             |
|                  | c86751_g1F            | AACTGGTTACGCTTGACATTTGC  | 138                         |
|                  | c86751_g1R            | CAGCGATCATGTCCGAACGG     |                             |
| C4H              | c76949_g1F            | GAGAGATGATTCTATGCTGTTAC  | 164                         |
|                  | c76949_g1R            | CGCATCTAATGCTGCAGTTTG    |                             |
|                  | c92819_g1F            | CGGGCAGTTTGCTACTCGG      | 205                         |
|                  | c92819_g1R            | CACAGCAGATAACGGCTACTTGAA |                             |
|                  | c76971_g1F            | GAGGAAAGATCTGAGAGCCAA    | 191                         |
|                  | c76971_g1R            | CGATGAACAGTTTGCTTATCGC   |                             |
| 4CL              | c22399_g1F            | CAGTACTATCGATGTGTCTGG    | 150                         |
|                  | c22399_g1R            | TGCAGATCTCGCCGGTTG       |                             |
|                  | c27318_g1F            | GGGGATTTATGATGTCTGCCT    | 156                         |
|                  | c27318_g1R            | CGCGTGTGTGTGTGTGATGC     |                             |
|                  | c91707_g1F            | CACCAACGCACAAAGCAGGT     | 138                         |
|                  | c91707_g1R            | AAGAGTCATCCTCAGTGGATG    |                             |
|                  | c92424_g8F            | GGTGTGAACACCAAGTTTGAAC   | 202                         |
|                  | c92424_g8R            | TAAGTCGTTACGGCCCTATGA    |                             |
| c92570_g1F       | GCTAGAAGCAGTGTTCAGAAG | 164                      |                             |

|               |                |                         |     |
|---------------|----------------|-------------------------|-----|
|               | c92570_g1R     | GAGCAACCACAACACTACATG   |     |
| <i>HPPR</i>   | c33512_g1F     | GACTTTACACTACTGGAATACTG | 175 |
|               | c33512_g1R     | CTTTGCCCTATCAACCACTGC   |     |
|               | c33629_g1F     | TGCCACGATTGATCAGGTATG   | 182 |
|               | c33629_g1R     | CAATAGTTTCACATGGCACAAG  |     |
| house keeping | <i>DtACT-F</i> | TCGTGAACATGGCGTCGTAC    | 206 |
|               | <i>DtACT-R</i> | CTGCTCTACATAAACTTCTACC  |     |
|               | <i>DtEF1-F</i> | GGCTGCTGCCAAGAAGGG      | 194 |
|               | <i>DtEF1-R</i> | CCTACCTGCCACAACCCA      |     |
